# Supplementary material for: A flexible doubly interpenetrated metal–organic framework with gate opening effect for highly selective C2H2/C2H4 separation at room temperature
Source: Royal Society of Chemistry journal article supplement (doi:10.1039/c8ce00174j), 2018-01-01
Supplement: c8ce00174j1.pdf [file c8ce00174j1.pdf]

## ***Supporting Information for the Manuscript***

### **A Flexible Doubly Interpenetrated Metal–Organic Framework with Gate Opening Effect for Highly Selective C<sub>2</sub>H<sub>2</sub>/C<sub>2</sub>H<sub>4</sub> Separation at Room Temperature**

*Di-Ming Chen, Xiao-Hui Liu, Jia-Hui Zhang and Chun-Sen Liu\**

Henan Provincial Key Lab of Surface & Interface Science, Zhengzhou University of Light Industry, Zhengzhou 450002, Henan, China

Corresponding Author E-mail: [chunsenliu@zzuli.edu.cn](mailto:chunsenliu@zzuli.edu.cn)

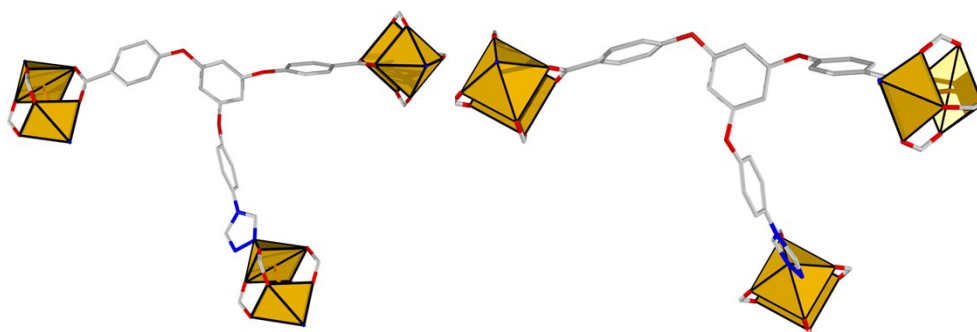

**Fig. S1** View for the coordination surroundings for the H<sub>2</sub>TPPB ligand.

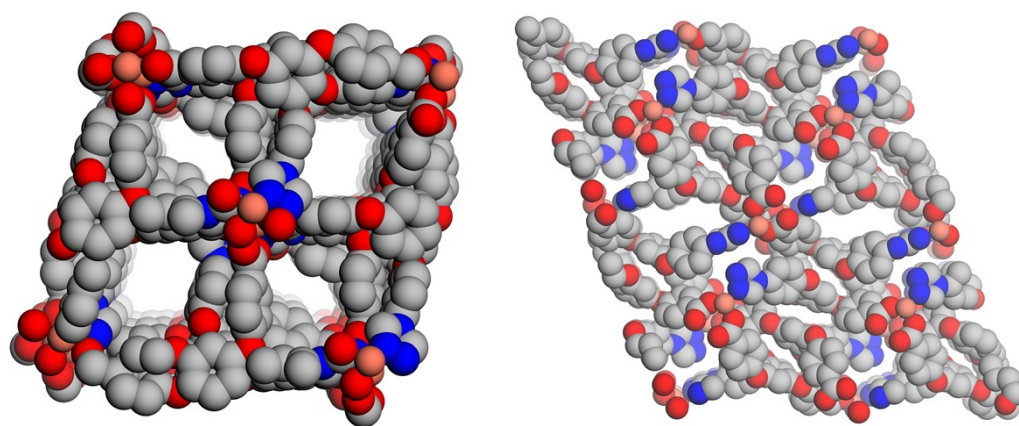

**Fig. S2** View for the two different pore structures of **1**.

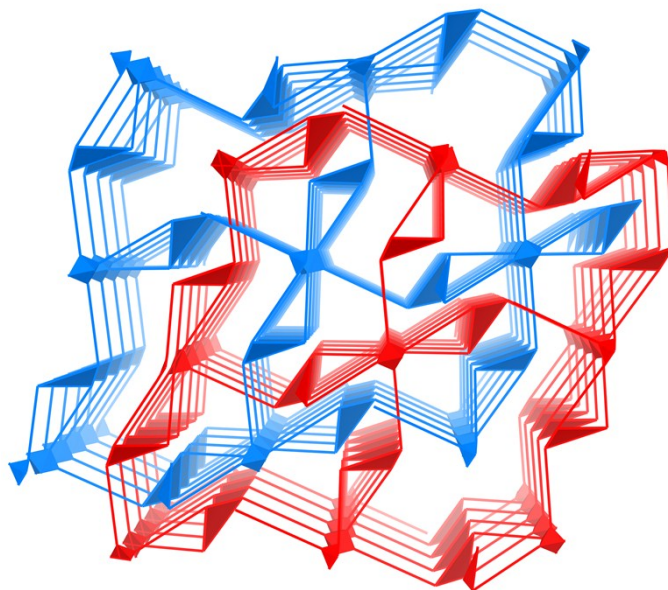

**Fig. S3** The simplified 2-fold interpenetrated **rtl**-type (3,6)-connected net for **1**.

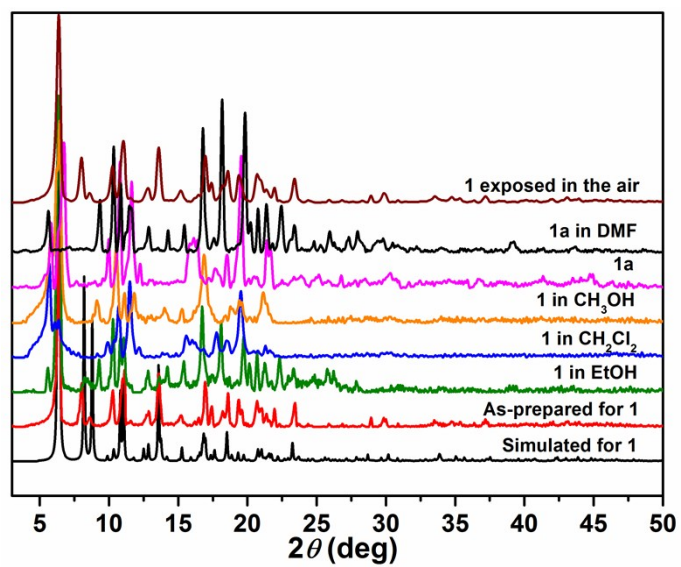

**Fig. S4** PXRD patterns of **1**.

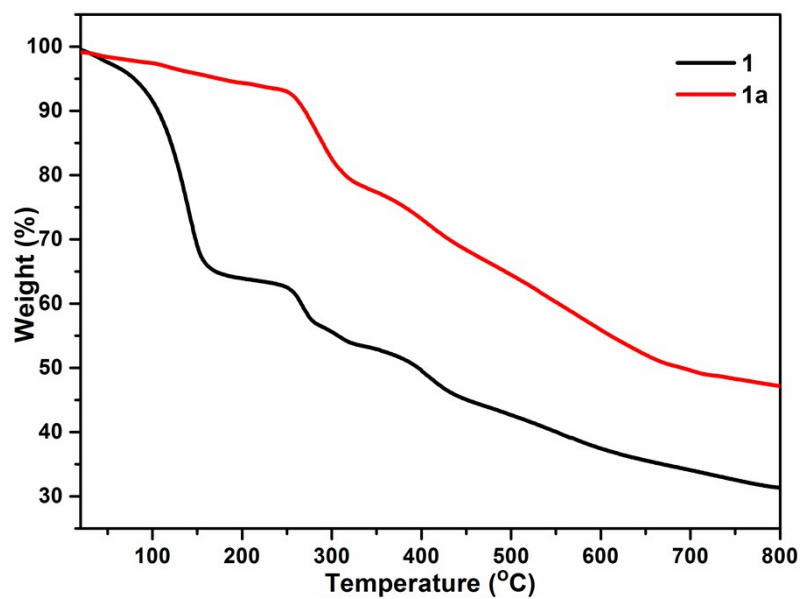

Fig. S5 Thermogravimetric curves of 1.

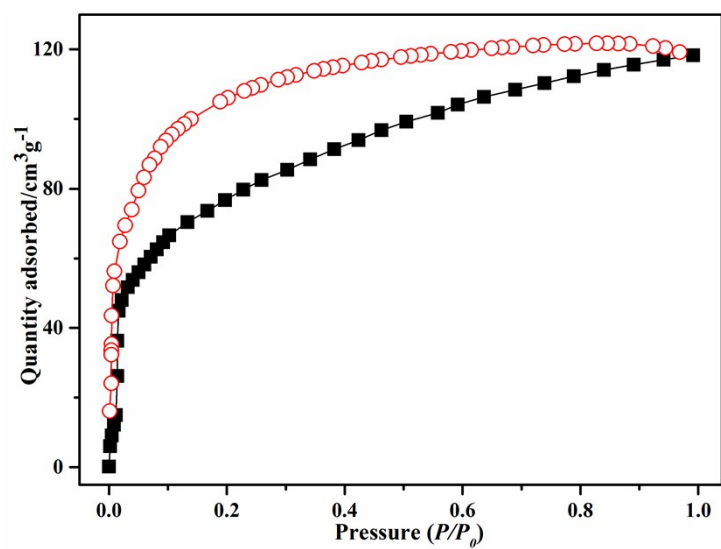

Fig. S6 The CO<sub>2</sub> sorption isotherm at 195 K.

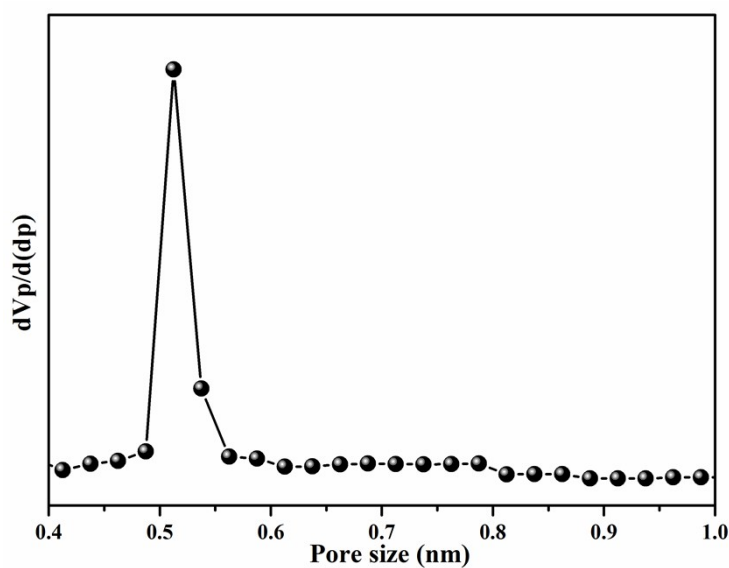

**Fig. S7** The pore size distributing of 1a derived from the CO<sub>2</sub> sorption isotherm at 195 K.

#### Calculation of Sorption Heat for C<sub>2</sub>H<sub>2</sub> and C<sub>2</sub>H<sub>4</sub> Uptake Using Virial Fitting.

$$\ln P = \ln N + 1/T \sum_{i=0}^m a_i N^i + \sum_{i=0}^n b_i N^i \quad Q_{st} = -R \sum_{i=0}^m a_i N^i$$

The above virial expression was used to fit the combined isotherm data for **1a** at 273 and 298 K, where P is the pressure, N is the adsorbed amount, T is the temperature, a<sub>i</sub> and b<sub>i</sub> are virial coefficients, and m and n are the number of coefficients used to describe the isotherms. Q<sub>st</sub> is the coverage-dependent enthalpy of adsorption and R is the universal gas constant.

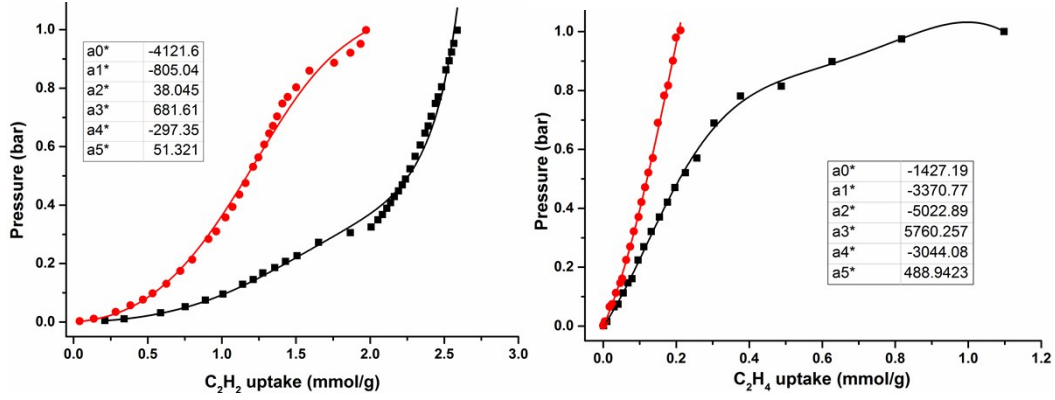

**Fig. S8** Virial fitting for the C<sub>2</sub>H<sub>2</sub> and C<sub>2</sub>H<sub>4</sub> adsorption isotherms of **1a**.

### Prediction of the C<sub>2</sub>H<sub>2</sub>/C<sub>2</sub>H<sub>4</sub> Adsorption Selectivity by IAST.

We adopt the ideal adsorbed solution theory (IAST) based upon the experimental single gas adsorption measurements as listed in the main text, including C<sub>2</sub>H<sub>2</sub> and C<sub>2</sub>H<sub>4</sub> at 298 K, which is commonly used to predict binary mixture adsorption selectivity. Before calculation of the sorption and separation properties, the adsorption isotherms were fitted using single-site Langmuir (SSL) models:

$$\text{SSL: } q = \frac{q_{\text{sat}}bp}{1 + bp}$$

Using the pure component isotherm fits, the adsorption selectivity is defined by:

$$S_{\text{ads}} = (q_1/q_2)/(p_1/p_2)$$

Where  $q_i$  is the amount of  $i$  adsorbed and  $p_i$  is the partial pressure of  $i$  in the mixture.

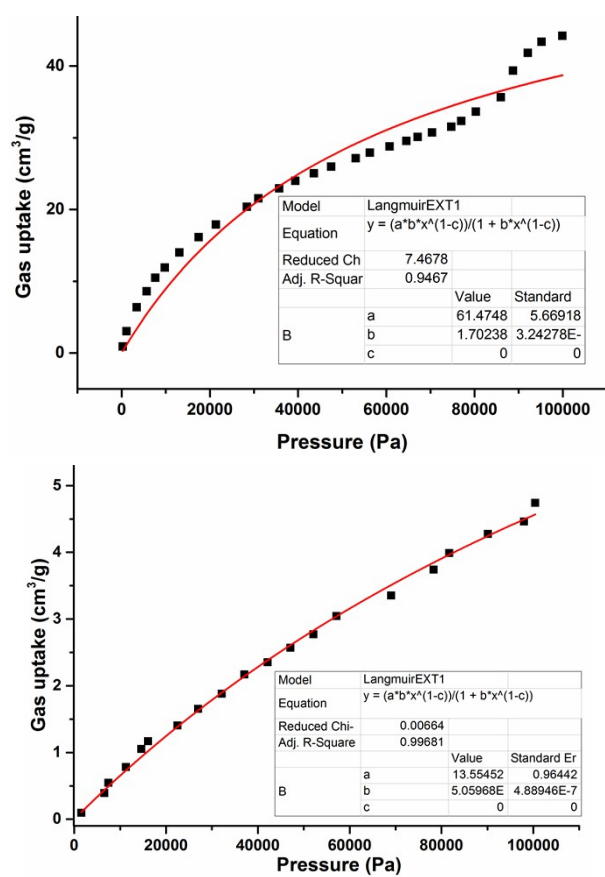

**Fig. S9** The SSL fitting for the C<sub>2</sub>H<sub>2</sub> and C<sub>2</sub>H<sub>4</sub> adsorption isotherms of **1a**.

**Table. S1** Crystal data and structure refinement for **1**.

|                                                |                                                                                |
|------------------------------------------------|--------------------------------------------------------------------------------|
| Empirical formula                              | C <sub>56</sub> H <sub>34</sub> Cu <sub>2</sub> N <sub>6</sub> O <sub>14</sub> |
| Formula weight                                 | 44.78                                                                          |
| Temperature/K                                  | 293(2)                                                                         |
| Crystal system                                 | triclinic                                                                      |
| Space group                                    | P-1                                                                            |
| <i>a</i> /Å                                    | 12.1088(4)                                                                     |
| <i>b</i> /Å                                    | 16.9597(8)                                                                     |
| <i>c</i> /Å                                    | 19.1362(4)                                                                     |
| $\alpha$ /°                                    | 111.443(4)                                                                     |
| $\beta$ /°                                     | 91.846(3)                                                                      |
| $\gamma$ /°                                    | 95.794(3)                                                                      |
| Volume/Å <sup>3</sup>                          | 3629.0(2)                                                                      |
| <i>Z</i>                                       | 51                                                                             |
| $\rho_{\text{calc}}$ /g/cm <sup>3</sup>        | 1.045                                                                          |
| $\mu$ /mm <sup>-1</sup>                        | 1.173                                                                          |
| Radiation                                      | CuK $\alpha$ ( $\lambda$ = 1.54184)                                            |
| Goodness-of-fit on $F^2$                       | 0.974                                                                          |
| Final <i>R</i> indexes [ $I \geq 2\sigma(I)$ ] | $R_1 = 0.0832$ , $wR_2 = 0.2366$                                               |
| Final <i>R</i> indexes [all data]              | $R_1 = 0.0935$ , $wR_2 = 0.2573$                                               |
| Largest diff. peak/hole / e Å <sup>-3</sup>    | 1.14/-0.74                                                                     |
| CCDC number                                    | 1547691                                                                        |
